# Supplementary material
Source: PubMed Central journal article supplement (PMC5796662)

**Supplemental Figure 1: CRISPR-dependent mutations favor transitions over transversions.** Heat maps represent the percentage of specific point mutation nucleotide changes detected in CRISPR-treated animals. For both animals, most mutations were G to A and C to T mutations.

**a**

**F03**

Variants by nucleotide

Mutect

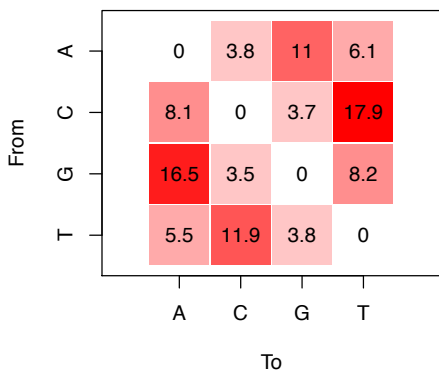

Lofreq

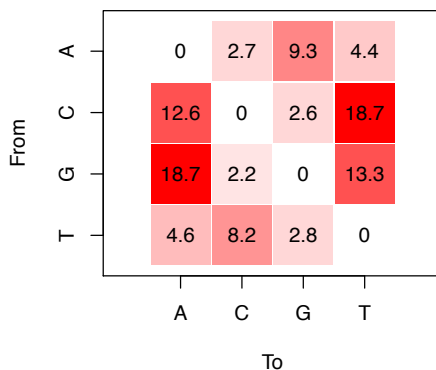

Strelka

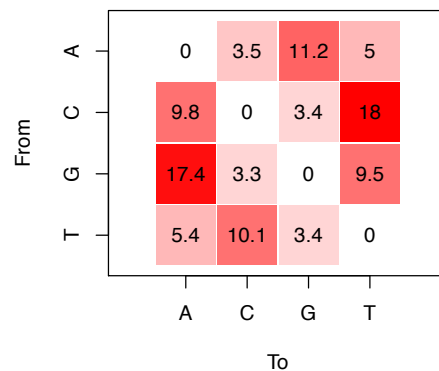

**b**

**F05**

Variants by nucleotide

Mutect

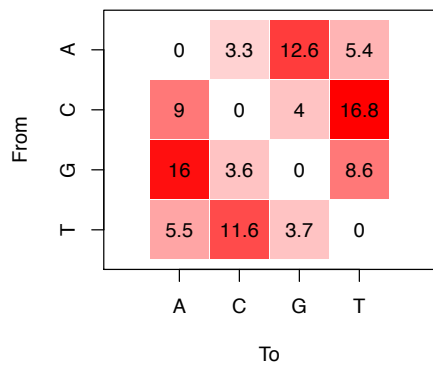

Lofreq

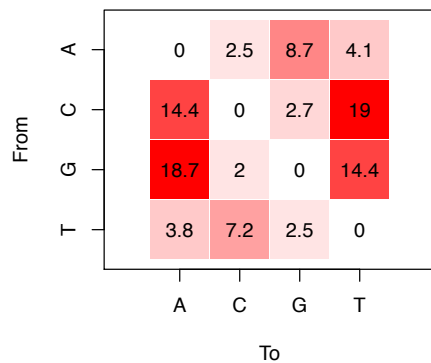

Strelka

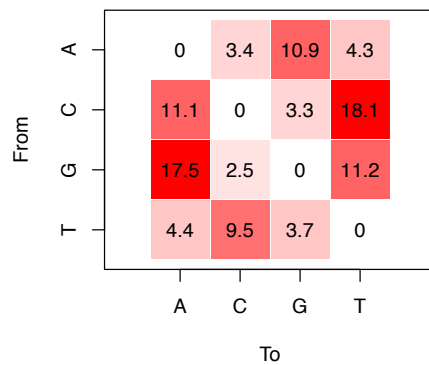

Supplemental Figure 2. Sanger sequencing confirms CRISPR-induced mutants detected by WGS. **a.** Example of a coding SNV confirmed to be heterozygous in F03. F05 is wildtype as is reported in Supplemental Tables 1 and 2. **b.** Example of an intronic SNV confirmed in both mice as reported in Supplemental Table 5. **c.** Example of an SNV in a snoRNA confirmed in both mice as reported in Supplemental Table 5.

**a** Coding SNV: *Olf1166*  
(p.Arg305Ser/c.915A>T)

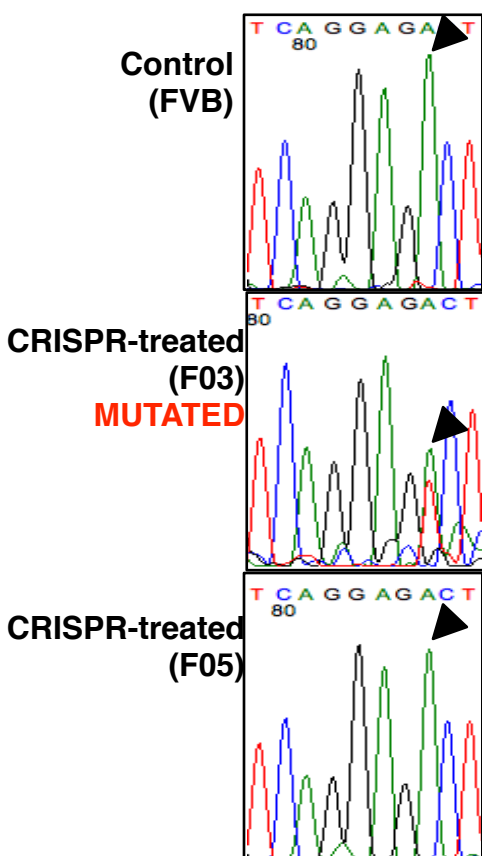

**b** Intronic SNV: 5530601H04RiK  
(chrX:105068204, A>G)

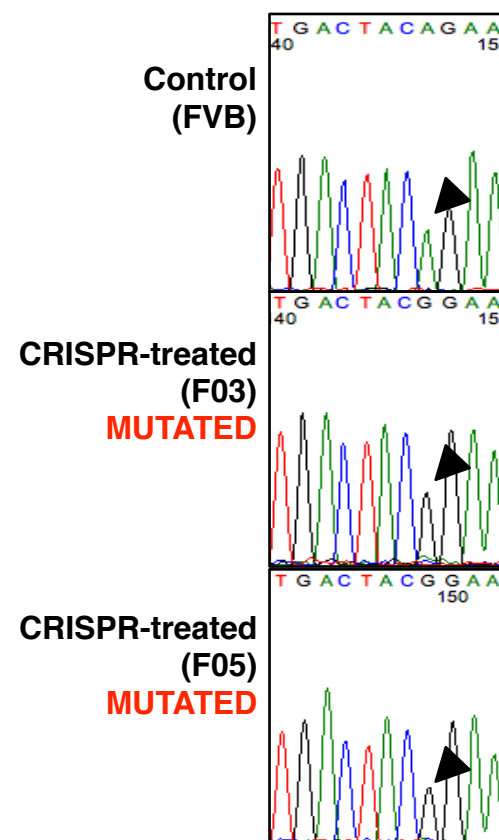

**c** snoRNA SNV: Gm23529  
(chr12: 33455323, A>G)

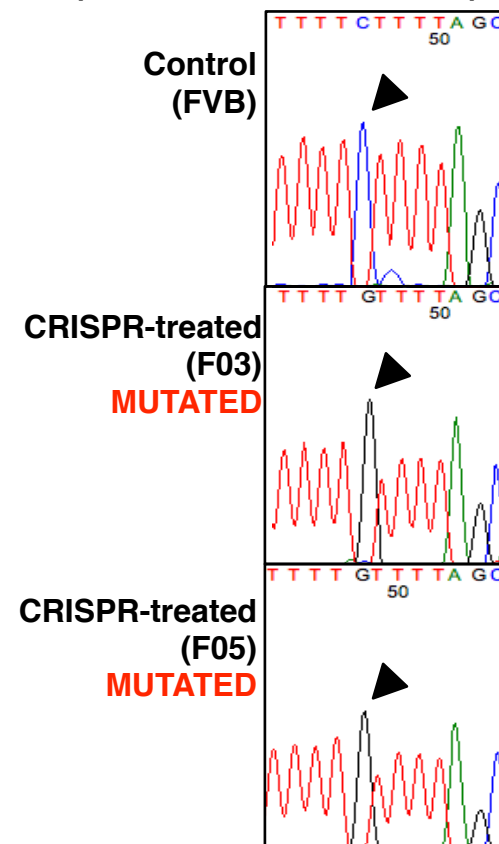

**Supplemental Figure 3: Sequence alignment of guide RNA to actual off-target regions does not show significant homology. a.** The top 10 predicted off-target regions predicted *in silico*, by Benchling, aligned to the gRNA. Sequences are 80-95% homologous to the gRNA. **b.** Regions surrounding 10 selected experimentally-observed SNVs in coding regions aligned to the gRNA. All regions were observed in both CRISPR-treated mice. Sequences are 15-45% homologous to the gRNA. **c.** Regions surrounding 10 selected experimentally-observed SNVs in non-coding region aligned to the gRNA. All regions were observed in both CRISPR-treated mice. Sequences are 5-65% homologous to the gRNA. **d.** Regions surrounding 10 selected experimentally observed indels in both coding and non-coding regions aligned to the gRNA. All regions were observed in both CRISPR-treated mice. Sequences are 25-65% homologous to the gRNA. (SNVs: single nucleotide variants, Indels: insertions/deletions)

**a Top 10-Predicted Off-Target Sites:**

|                 |                       |                    |
|-----------------|-----------------------|--------------------|
| gRNA            | CCAACCTTAAGTAGCAGAAAG |                    |
| chr5:108850293  | CCAACCTTACGTAGCAGAAAG | Vmn2r9             |
| chr10:124707862 | GCAAGCTTAAGTAGCAGAAAG | No Associated Gene |
| chr10:112240327 | CTTACCTTAAGAAGCAGAAAG | No Associated Gene |
| chr8:78482617   | AGAACAATAAGTAGCAGAAAG | No Associated Gene |
| chr5:149431129  | CTTCCCTGATTAGCAGAAAG  | Medag              |
| chr18:86934169  | CACCCCTAATTAGCAGAAAG  | No Associated Gene |
| chr13:40729083  | CTTACCTCAGTACAGAAAG   | Tfap2a             |
| chr12:37561612  | CAAACTTAAGGAGCAGAAAT  | Agmo               |
| chr2:145262171  | ACAAACAACAGTAGCAGAAAG | Slc24a3            |
| chr11:110958499 | CAAGCAGAGTAGCAGAAAG   | No Associated Gene |

**b 10 True off-target site SNVs in Coding Regions**

|                 |                       |          |
|-----------------|-----------------------|----------|
| gRNA            | CCAACCTTAAGTAGCAGAAAG |          |
| chr18:67834688  | CCAAACATCTCTCATGTCTT  | Cep192   |
| chr 9 :66434164 | AGTTATGTGGAAACAGACACC | Herc1    |
| chr7:63938170   | CTGCCTCCACGCGGGCTGG   | Klf13    |
| chr15:8324487   | CCAACA CTTTCAGTTCCAGC | Nipbl    |
| chr19:12283753  | GTAGGTCCAAAGGCCCTTCAA | Olfr1433 |
| chr10:76356251  | CCACTCGAAACGGCGGAACCT | Pcnt     |
| chr15:76176864  | CCCCACGTGTCCAGCAGCTCT | Plec     |
| chr2:129609045  | CCATTAGGTGGTACAGAGGA  | Sirpa    |
| chr5:124885592  | CCATACAGCAGAGAAACCCC  | Zfp664   |
| chr2:167056200  | CAACC CAGAGGCTCTCAA   | Znfx1    |

**c 10 True off-target site SNVs in Non-coding Regions**

|                 |                        |                                 |
|-----------------|------------------------|---------------------------------|
| gRNA            | CCAACCTTAAGTAGCAGAAAG  |                                 |
| chr1:190479227  | CTTTTCAGCCTTGGTTCAGAGA | Gm23153 (miscellaneous RNA)     |
| chr2:92591648   | GTTTTCA TGGTCCGTGGCAGG | Mir7221 (miRNA)                 |
| chr2:140439882  | CTTTTCGTAGTGTGGTCC     | Gm23846 (snRNA)                 |
| chr5:62132979   | GAAACCTTAAGATACAGAAAT  | Gm22273 (snoRNA)                |
| chr6:31721846   | TTTTCTTTTAA TGGTGGCTGG | Gm13847 (lincRNA)               |
| chr6:133758061  | CCAAATTCTAAGAAAGGGGAC  | Gm23375 (miRNA)                 |
| chr11:54214410  | ATGTTTGTACCCTTGTGTC    | 4933405E24Rik (lincRNA)         |
| chr11:83274656  | CCATAGCTACGAACACAGAG   | Gm23444 (snRNA)                 |
| chr11:112711337 | CTCCAGACATTTGAATGAGCC  | BC006965 (processed transcript) |
| chr18:54449411  | CACACACAGAGAGAGAGAGA   | Redrum (lincRNA)                |

**d 10 True off-target site Indels**

|                |                         |               |
|----------------|-------------------------|---------------|
| gRNA           | CCAACCTTAAGTAGCAGAAAG   |               |
| chr4:106562094 | CCCTCCCTTATATTCCTCTCT   | 2700068H02Rik |
| chr1:188016221 | CCCAAGCTAACCTGTTTGCCCA  | Esrrg         |
| chr18:31470317 | TCAAATAAGTAGCAAAAGAT    | Gm25396       |
| chr4:134618126 | CAAAAGGAGCTCAGGTTCAGA   | Man1c1        |
| chr17:31443854 | TCAAACGAGCTGAAAGCCGAA   | Pde9a         |
| chr8:107584736 | CCAAAGCCTTTGGCAGTAAT    | Psmc7         |
| chr18:31910970 | GC GGCCAGCAGCAGACACAG   | Sft2d3        |
| chr19:50287677 | AAAAACA TTTCAAATGCAATAA | Sorcs1        |
| chr2:30020366  | GCAACCTT GAGCA CAGAGTCC | Sptan1        |
| chr4:132857590 | CCAGCACCTACTCACCAAGCT   | Stx12         |

**Supplemental Figure 4: Off-target CRISPR mutations could cause unwanted phenotypes.** Pie charts show the SNVs and indels detected in WGS of CRISPR-treated animals based on assigned biotype. Biotypes were assigned by SNPEff software (Cingolani P, et al. Fly, 2012.) Intragenic regions were not assigned a biotype.

**a**

**F03**

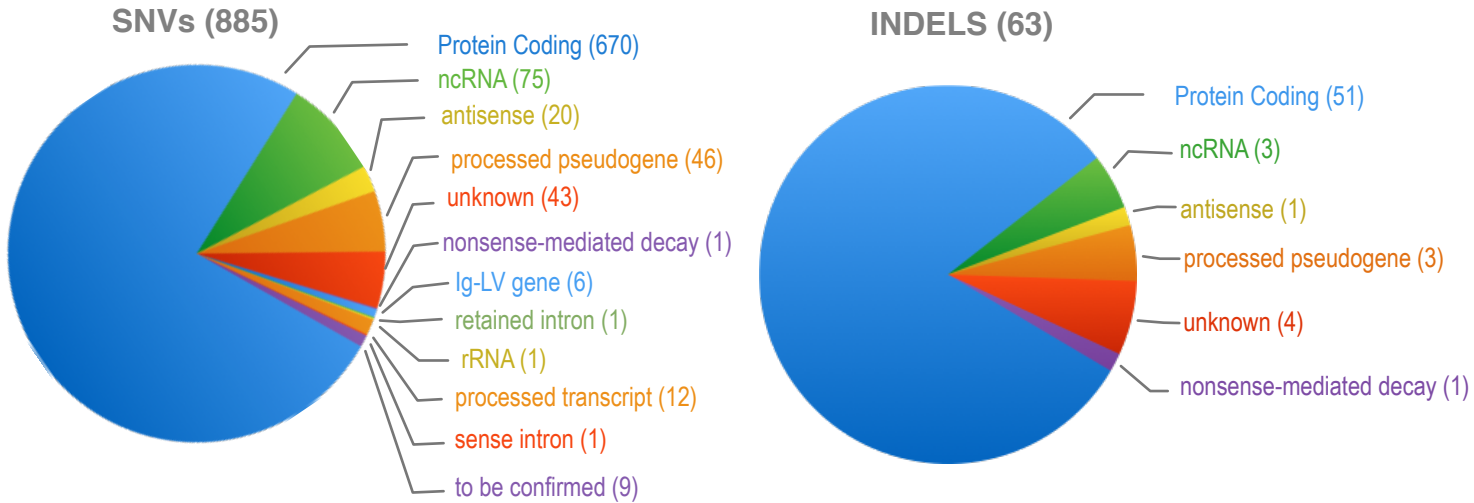

**b**

**F05**

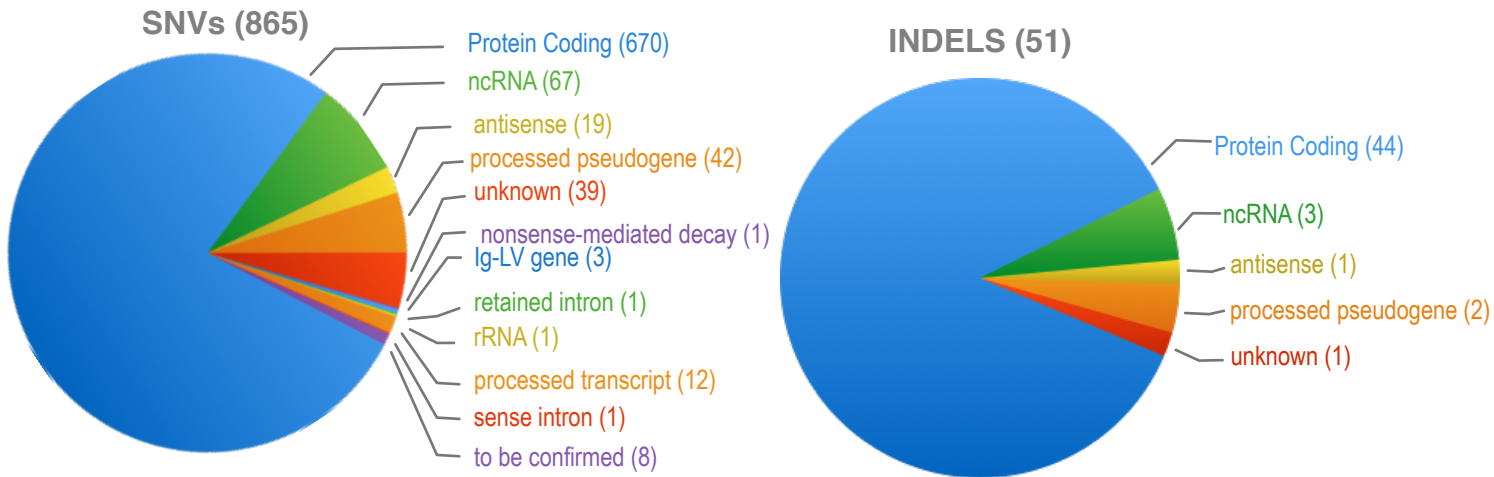

Supplement: NIHMS935156-supplement-Supplemental_Figures.pdf [file NIHMS935156-supplement-Supplemental_Figures.pdf]
